# Supplementary material for: Selection and Validation of Reference Genes for Reverse-Transcription Quantitative PCR Analysis in Sclerotium rolfsii
Source: MDPI journal article supplement (doi:10.3390/ijms242015198), 2023-10-15
Supplement: s1 [file s1]

**Table S1.** Expression levels of the seven candidate reference genes.

| Gene         | All samples | Developmental stage | Population | Fungicides | Photoperiod | pH         |
|--------------|-------------|---------------------|------------|------------|-------------|------------|
| <i>18S</i>   | 6.24±0.61   | 6.55±0.41           | 6.33±0.43  | 5.80±0.61  | 6.42±0.48   | 6.71±0.32  |
| <i>28S</i>   | 8.13±0.44   | 7.96±0.42           | 7.97±0.54  | 7.98±0.29  | 8.18±0.17   | 8.66±0.33  |
| <i>EF1α</i>  | 15.41±1.69  | 18.08±3.08          | 15.42±0.83 | 14.67±0.99 | 14.74±0.26  | 15.56±0.42 |
| <i>GAPDH</i> | 16.22±1.44  | 18.53±2.15          | 16.56±1.04 | 15.47±0.86 | 15.59±0.79  | 16.28±0.18 |
| <i>PGK</i>   | 18.45±1.33  | 20.49±2.56          | 18.46±0.47 | 18.00±0.71 | 17.65±0.29  | 18.52±0.42 |
| <i>β-TUB</i> | 18.61±1.90  | 21.69±3.11          | 18.17±1.62 | 17.68±0.89 | 18.39±0.20  | 19.01±0.33 |
| <i>UBC</i>   | 15.68±0.93  | 16.57±1.68          | 15.56±0.50 | 15.44±0.71 | 15.80±0.90  | 15.62±0.54 |

Note: Values are means ± SD.

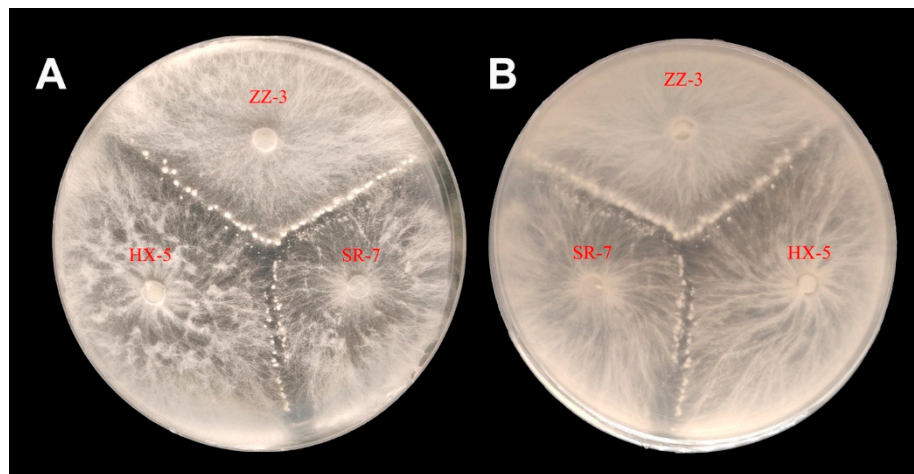

**Figure S1.** Mycelial interactions of three different mycelial compatibility groups (MCGs). (A) Colony morphology viewed from front side. (B) Colony morphology viewed from reverse side. The diameter of Petri dish is 90 mm.

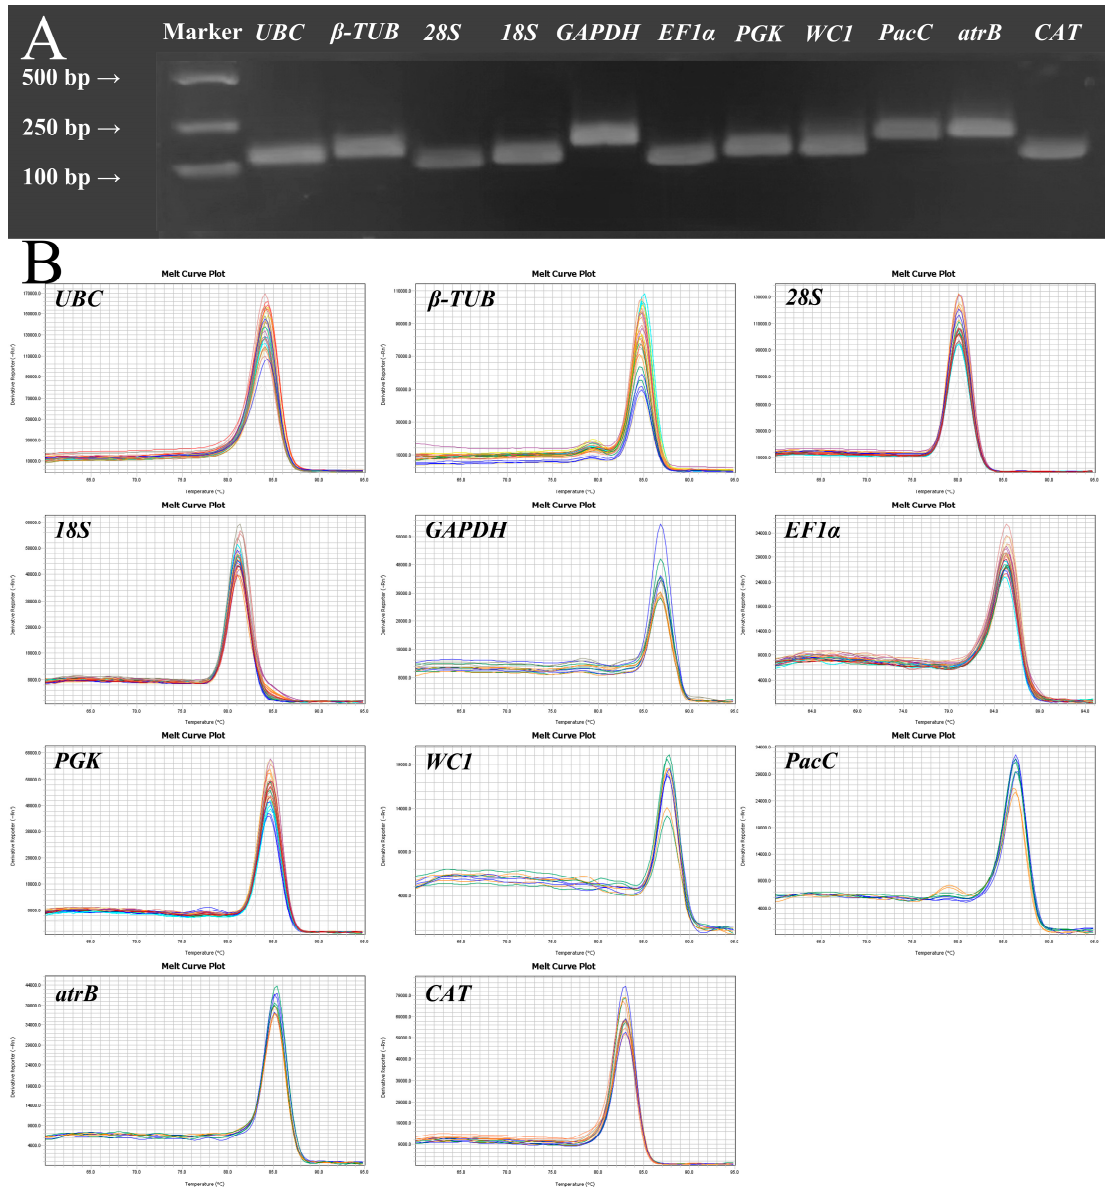

**Figure S2.** The amplification specificity of designed primers analyzed from (A) 2% agarose gel electrophoresis and (B) melting curve analysis.
